# Supplementary material
Source: HighWire-hosted journal article supplement (doi:10.1101/rna.079254.122)
Supplement: Supplemental_Material__.docx [file Supplemental_Material__.docx]

**Supplementary Information**

**Antisense pairing and SNORD13 structure guide RNA cytidine acetylation**

Supuni Thalalla Gamage,1# Marie-Line Bortolin-Cavaillé,2# Courtney Link,1 Keri Bryson,1 Aldema Sas-Chen,3 Schraga Schwartz,4 Jérôme Cavaillé,2* Jordan L. Meier1*

1. Chemical Biology Laboratory, National Cancer Institute, Frederick, Maryland 21702, United States.

2. Molecular, Cellular and Developmental Biology unit (MCD), Centre de Biologie Integrative (CBI), University of Toulouse; UPS; CNRS; 118 route de Narbonne, 31062 Toulouse, France

3. The Shmunis School of Biomedicine and Cancer Research, The George S. Wise Faculty of Life Sciences, Tel Aviv University, Tel Aviv, Israel.

4. Department of Molecular Genetics, Weizmann Institute of Science, Rehovot, Israel

*Corresponding authors: [jordan.meier@nih.gov](mailto:jordan.meier@nih.gov), [jerome.cavaille@univ-tlse3.fr](mailto:jerome.cavaille@univ-tlse3.fr)

#These authors contributed equally to this manuscript.

**Table of Contents**

Page

Supplementary Figures S1-S9 S2-11

Supplementary Gel Images S12

Experimental Methods S13-16

SNORD13 wild-type (WT) and mutant sequences S17

H45-ITS1 WT and mutant sequences S18

References S19

**Supplementary Figures**

**Figure S1**. Schematic representation of base pairing interactions predicted to be involved in the formation of Stem I. When possible, nucleotide changes that are not expected to alter Stem I (G/U wobble base pairs and other compensatory base changes) are shown in green while those that shorten or destabilize these elements are shown in red. Human and *A. thaliana* SNORD13 (snoR105 isoform) sequences were used as references for Metazoan and Plants, respectively. Representative species of Metazoan and Viridiplantae kingdoms are given. When multiple SNORD13-related sequences exist in the genomes, only one is shown except for *A. thaliana* where three SNORD13 isoforms are formally annotated.

**Figure S2.** Schematic representation of base pairing interactions predicted to be involved in the formation of Stem II. When possible, nucleotide changes not expected to alter Stem II (G/U wobble base pairs and other compensatory base changes) are shown in green while those that shorten or destabilize these elements are shown in red. Human and *A. thaliana* SNORD13 (snoR105 isoform) sequences were used as references for Metazoan and Plants, respectively. Representative species of Metazoan and Viridiplantae kingdoms are given. When multiple SNORD13-related sequences exist in the genomes, only one is shown except for *A. thaliana* where three SNORD13 isoforms are formally annotated.

**Figure S3**. Schematic representation of base pairing interactions predicted to be involved in the formation of Stem III, IV and V (and others related external stems). Representative species of Metazoan and Viridiplantae kingdoms are given When multiple SNORD13-related sequences exist in the genomes, only one is shown except for *A. thaliana* for which three SNORD13 isoforms were formally annotated.The C- and D- boxes are highlighted in pink and the sheared G:A base pairs of the k-turn are denoted by two dotted lines.

**
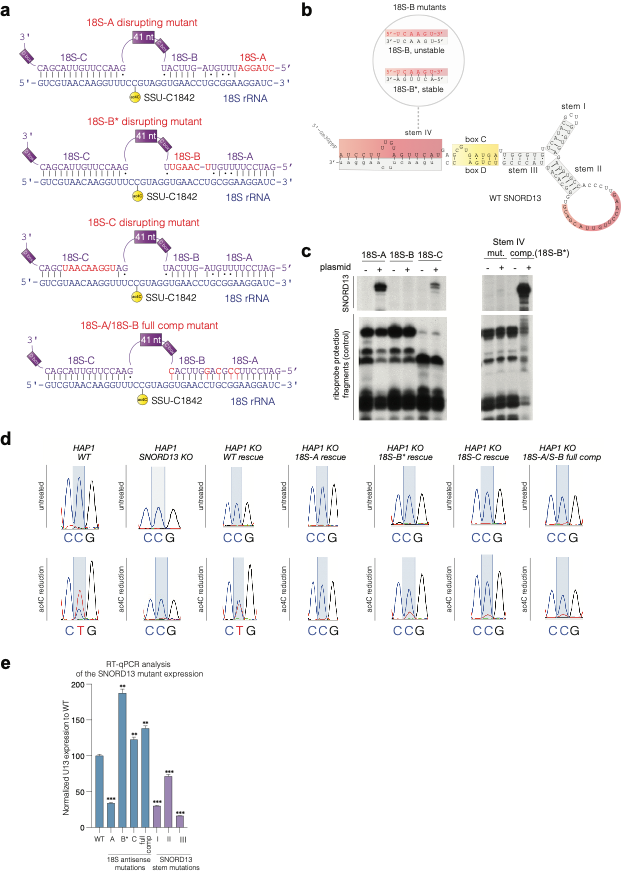
**

**Figure S4.** (a) Sequences of human SNORD13 mutants analyzed and referenced in Figure 4b. In addition to wild-type (“WT”) sequence, disruptive mutations (18S-A, 18S-B*, 18S-C mutants), and a mutant with increased complementarity (“18S-A/18S-B full comp”) were explored for rescue of ac4C in SNORD13 KO cells. (b) Sequences of SNORD13 18S-B mutants referenced in Figure 4c. Mutation of SNORD13 in mutant ‘18S-B’ disrupts stem IV. Re-introduction of complementarity in construct 18-B* (bottom) allows accumulation and testing of function. (c) Verification of expression of 18S-A, 18S-B, 18S-C, 18S-B* constructs by RNAse A/T1 mapping. Expression of 18S-A/B full comp was verified by Northern (data not shown). (d) Exemplary sequencing traces for WT, SNORD13 KO, and ectopically-expressed SNORD13 rescue experiments referenced in Figure 4d. (e) RT-qPCR analysis of the SNORD13 expression levels. Mutant Ct values are normalized relative to the WT SNORD13, which was set to equal 100%. Values represent n =3 biological replicates, analyzed by two-tailed Welch’s *t* test (ns = not significant, * = *P* < 0.05, ** = *P* < 0.01, and *** = *P* < 0.001).

**Figure S5.** (a) Expression schematic for h45-ITS1 minigene construct driven by Pol I and (b) Pol II promoters. The presence of T7 and Sp6 primer binding sites allow differentiation of the h45-ITS1 minigene construct from endogenous helix 45 rRNA in ac4C sequencing experiments. (c) Bar graph of ac4C levels at site corresponding to SSU-1842 in h45-ITS1 minigenes driven by Pol I or Pol II promoters, respectively. Values represent ac4C-dependent misincorporation rates normalized relative to the WT Pol1 h45-ITS1, which was set to equal 100%.

**Figure S6.** Exemplary sequencing traces for modification ectopically-expressed h45-ITS1 minigene substrates referenced in Figure 5b and 5e.

**Figure S7.** Re-analysis of modification of a degenerate RNA substrate library upon overexpression of human NAT10/THUMPD1. (a) Schematic of experiment analyzed from Sas-Chen et al. 2020.*1* HEK-293T cells were co-transfected with NAT10, THUMPD1, and a plasmid expressing a portion of the coding sequence of Baz2a, an mRNA continaing a 5’-CCG-3’ sequence that becomes acetylated when NAT10/THUMPD1 are massively overexpressed in this cell line. RNA is isolated and subjected to ac4C-seq to analyze the induction of ac4C at variants of the 5’-CCG-3’ consensus sequence. (b) Raw ac4C signal at 5’ (XCG) and 3’ (CCX) consensus sequences in Baz2a substrate. % misincorporation represents value relative to controls that were not treated with NaCNBH3/HCl. Typical misincorporation rates in untreated controls were 0.1-0.3%. (c) Normalized ac4C signal at 5’ (XCG) and 3’ (CCX) consensus sequences. 5’-CCG-3’ was set to 100%. NaCNBH3/HCl-dependent misincorporation at 5’-ACG-3’ and 5’-UCG-3’ is consistent with the ability of overexpressed eukaryotic NAT10 to modify these substrates, albeit with greatly reduced eficiency relative to 5’-CCG-3’.

**Figure S8.** (a) Structure of h45-ITS1 substrates in which the 5’-CCG-3’ consensus sequence is shifted 1 bp (+1bp) or 3 bp (+3bp; reproduced from Figure 5h). (b) Exemplary sequencing traces showing site of modification in h45-ITS1 substrates containing multiple 5’-CCG-3’ sequences in acetylation loop.

**Figure S9.** Exemplary sequencing traces forSNORD13 18S-A mutant and h45-ITS1 18S-A mutant pair.

**Supplementary Gel Images**

Scanned gel images for RNase A/T1 protection experiment. This assay incubates RNA isolated from transfected cells with 32P-labelled antisense riboprobes specific for each mutated version of SNORD13. RNase A/T1 is then added to the hybridization reactions to digest single-stranded overhang regions of RNA molecules, while RNA-RNA hybrids are resistant to cleavage. The use of riboprobes specific to human SNORD13 in a murine (L929) background means SNORD13 full length RNA fragments are detected only in transfected samples. Undigested riboprobe is observed at the top of the gel, while protection signals at the bottom of the gel which are detected in both transfected and non-transfected samples, originate from partial protection of endogenous background RNAs (including mouse SNORD13, due to sequence divergence between human and mouse), providing a rough measure of loading. Red box denotes lanes used in Figure 3, blue box indicates lanes used in Figure S4c. Positions corresponding to the undigested probe (top of gel) and SNORD13 (middle) are annotated. A truncated form of SNORD13 is consistently detected as well (also mentioned in Bortolin-Cavaille et al., Nucleic Acids Res., 2022).*1* Whether this represents a degradation product or active SNORD species has not yet been determined.

**Experimental methods**

**Cell culture, transfection and RNA extraction**

HEK-293T and L929 cells were grown in Dulbecco's modified Eagle medium (DMEM; 4.5 g/L glucose). HAP1 cells were grown in Iscove’s Modified Dulbecco’s Medium (IMDM; 4.5 g/L glucose). All cell culture media were supplemented with 10% fetal bovine serum (PAN biotech), 1 mM Sodium Pyruvate (Gibco) and 1% penicillin/streptomycin (Sigma-Aldrich). Cells were incubated at 37 °C with 5% CO2. L929 and HEK-293T cells (70-80% confluency in 6-well plates) were transiently transfected with plasmids using Lipofectamine 2000 (Invitrogen) according to the manufacturer’s instructions. Briefly, 5 µL of Lipofectamine 2000was diluted in 250 µL Opti-MEM I medium (solution A) andincubated for 5 min. at room temperature. A solution B was prepared with 4 µg of plasmid diluted in 250 µL Opti-MEMI. Solutions A and B were mixed gently (drop-by-drop) and incubated for 20 min. at room temperature.Plasmid-Lipofectamine complexes (500 µL) were then added to seeded L929 or HEK-293T cells. Using GenePulser Xcell (Biorad; 270V, 950µF, 4 mm cuvette), half a T175 culture flask containing SNORD13-KO HAP1 cells at 70-80% confluency was co-electroporated with 8 µg of SNORD13-expressing plasmids and 1 µg of GFP-expressing plasmid (pGFPmax). Forty-eight hours post-transfection, GFP positive cells (~1 million) were sorted using fluorescence-activated cell sorting (BD Influx System (USB) and total RNA was prepared using Tri-reagent (Euromedex)according to the manufacturer's instructions before treatment withRQ1 DNase-RNase free (1u/µl; Promega) and proteinase K (25 mg/mL; Sigma).

**Preparation of SNORD13 constructs, SNORD13 mutagenesis and RNAse A/T1 protection**

A 1.2 kb-long genomic DNA fragment overlapping human SNORD13 gene (hg38: Chr8: 33,512,975-33,514,174) was PCR amplified and cloned into the EcoRI and XbaI sites of the pKS plasmid. SNORD13 mutants were then generated by multi-step PCR (SNORD13 mutant sequences and primer sequences are provided below and in Supplementary Table S1). DNA sequencing was used to confirm the introduced mutations. Plasmids were transfected in L929 cells and total RNA was analyzed by RNAse A/T1 mapping. Briefly, 10 µg of total RNA was hybridized overnight at 42°C with ~ 50 000 cpm of gel-purified [α32P]-labeled riboprobes in 10 µL of S1 solution (40 mM PIPES, 400mM NaCl, 1 mM EDTA, 80% formamide). Samples were treated for 60 min at room temperature with 100 µL of RNAse A/T1 buffer (10 mM Tris-Cl pH 7.5, 200 mM NaCl, 5 mM EDTA, 100 mM LiCl, 20-40μg/mL RNase A (Sigma), RNase T1 100 u/mL (Ambion)) followed by a 15-min treatment at 37°C with proteinase K (25 mg/mL, Sigma). After extraction with phenol chloroform-isoamyl alcohol, RNA was precipitated and fractionatedby electrophoresis on a 6% acrylamide, 7 M urea denaturing gel. SNORD13-expressing plasmids were used to produce PCR templates for producing antisense riboprobe via T7 in vitro transcription.

**Ac4C-sequencing of endogenous SSU-C1842**

DNase treated Total RNA samples (1 µg) were treated with sodium cyanoborohydride (100 mM in H2O) or vehicle (H2O) in a final reaction volume of 100 μL. Reactions were initiated by the addition of 1 M HCl to a final concentration of 100 mM and incubated for 20 min at room temperature. Reactions were stopped by the addition of 30 μL 1 M tris−HCl pH 8.0. The quenched reactions were adjusted to 200 μL with H2O and purified via ethanol precipitation. The pelleted RNA was dried using a Speedvac, resuspended in ddH2O, and quantified using a Nanodrop 2000 spectrophotometer. For the reverse transcription reaction with the SuperScript III enzyme, first ~500 pg of treated RNA were incubated with 4.0 pmole of the h45 reverse primer (5'-TAATGATCCTTCCGCAGGTTCACCTAC-3') in 1X Superscript III buffer at 65 °C for 5 min and transferred to ice for 1 min to facilitate annealing. After annealing, reverse transcriptions were performed by adding 200 units of the SuperScript III enzyme, 5 mM DTT, 25 units of RNasin, 500 μM dNTPs (5 mM GTP, 10 mM CTP, ATP, and TTP) and incubating at 55 °C for 60 min. Reactions were quenched by increasing the temperature to 70 °C for 15 min. The cDNA products from the reactions and controls were directly used in PCR. PCR reactions were set up with 2 μL cDNA in 50 μL PCR reaction with Phusion Hot start flex (New England Biolabs). Reaction conditions: 1X supplied HF buffer, 200 μM each dNTP, 2.5 pmol each forward (5'-CGTCGCTACTACCGATTGGATGG-3') and reverse (5'-TAATGATCCTTCCGCAGGTTCACCTAC-3') primers, 2 units of Phusion hot start enzyme, 2 μL template (Thermocycling conditions: 67 °C annealing, 34 cycles). PCR products were run on a 2% agarose gel, stained with SYBR safe, and visualized on a UV transilluminator at 302 nm. Bands of the desired size were excised from the gel. DNA was extracted using a QIAquick gel extraction kit from Zymo and submitted for Sanger sequencing (GeneWiz) using 5 μM of the forward PCR primer. Processed sequencing traces were viewed using 4Peaks software. Peak height for each base was measured, and the percent misincorporation was determined using the equation: “percent misincorporation = (peak intensity of T)/ (sum of C and T base peaks) X 100%”. Misincorporation values were determined by subtracting the average background water control misincorporation levels from that of the corresponding reactions. Then the misincorporation values of each construct were normalized to empty vector value followed by the wild type value. Values represent n =3 biological replicates, analyzed by two-tailed Welch’s *t* test (ns = not significant, * = *P* < 0.05, ** = *P* < 0.01, *** = *P* < 0.001, and **** = *P* < 0.0001).

**Preparation of h45-ITS1 minigene constructs**

A PCR amplified fragment corresponding to the human 18S (57 nt)-ITS1 (13 nt) junction was cloned into the Hind III and BamHI sites of the human ribosomal RNA (Pol-I) minigene phPol1EX (doi/10.1261/rna.1657609) or pcDNA 3.1 which drives expression from a RNA Pol-II (CMV) promoter. Mutated versions were generated by multi-step PCR and DNA sequencing was used to confirm mutations (h45-ITS1 and primer sequences are provided below and in Supplementary Table S1).

**Ac4C-sequencing of h45-ITS1 constructs**

DNase treated Total RNA samples (~5 µg) were treated with sodium cyanoborohydride (100 mM in H2O) or vehicle (H2O) in a final reaction volume of 100 μL. Reactions were initiated by the addition of 1 M HCl to a final concentration of 100 mM and incubated for 20 min at room temperature. Reactions were stopped by the addition of 30 μL 1 M tris−HCl pH 8.0. The quenched reactions were adjusted to 200 μL with H2O and purified via ethanol precipitation. The pelleted RNA was dried using a Speedvac, resuspended in ddH2O, and quantified using a Nanodrop 2000 spectrophotometer. For the reverse transcription reaction with the SuperScript III enzyme, first ~2 μg of treated RNA were incubated with 4.0 pmole of the T7 reverse primer (5'-TAATACGACTCACTATAG -3') in 1X Superscript III buffer at 65 °C for 5 min and transferred to ice for 1 min to facilitate annealing. After annealing, reverse transcriptions were performed by adding 200 units of the SuperScript III enzyme, 5 mM DTT, 25 units of RNasin, 500 μM dNTPs (5 mM GTP, 10 mM CTP, ATP, and TTP) and incubating at 55 °C for 60 min. Reactions were quenched by increasing the temperature to 70 °C for 15 min. The cDNA products from the reactions and controls were directly used in PCR. PCR reactions were set up with 2 μL cDNA in 50 μL PCR reaction with Phusion Hot start flex (New England Biolabs). Reaction conditions: 1X supplied HF buffer, 2.5 pmol each SP6 forward (5'-ATTTAGGTGACACTATAGAA -3') and T7 reverse (5'-TAATACGACTCACTATAG-3') primers, 200 μM each dNTP, 2 units of Phusion hot start enzyme, 2 μL template (Thermocycling conditions: 52 °C annealing, 33 cycles). PCR products were run on a 2% agarose gel, stained with SYBR safe, and visualized on a UV transilluminator at 302 nm. Bands of the desired size were excised from the gel. DNA was extracted using a QIAquick gel extraction kit from Zymo and submitted for Sanger sequencing (GeneWiz) using 5 μM of the SP6 forward PCR primer. Processed sequencing traces were viewed using 4Peaks software. Peak height for each base was measured, and the percent misincorporation was determined using the equation: “percent misincorporation = (peak intensity of T)/ (sum of C and T base peaks) X 100%”. Misincorporation values were determined by subtracting the average background water control misincorporation levels from that of the corresponding reactions. Then the misincorporation values of each construct were normalized to the wild type value. Values represent n =3 biological replicates, analyzed by two-tailed Welch’s *t* test (ns = not significant, * = *P* < 0.05, ** = *P* < 0.01, *** = *P* < 0.001, and **** = *P* < 0.0001).

**RT-qPCR analysis of SNORD13 mutant expression**

DNase treated total RNA (100 ng) from GFP-sorted cells were used for the RT-qPCR analysis. Specific primers were designed for the RT-qPCR of each SNORD13-18S and Stem mutant RNA (See Table below) and used with the Luna Universal One-Step RT-qPCR kit (cat. no. E3005, NEB) according to the manufacture protocol. Briefly, 20 µL reactions were set up with 10 µL of the 2x Luna Universal One-Step Reaction Mix, 1 µL of the 20X Luna WarmStart RT enzyme mix, 0.8 µL of 10 µM forward and reverse primers, 100 ng of template RNA and water. U6 snoRNA was used as the housekeeping gene. Assay mix was set up in triplicate for each reaction and control. They were loaded onto a 96-well plate and the plate was centrifuged at 1500 rpm for 1 min to remove bubbles and collect liquid. RT-qPCR assay was performed on a Roche LightCycler 480 II instrument under the SYBR Green/ROX2 detection format setting. Assay conditions: reverse transcription at 55 °C for 10 min, initial denaturation 95 °C for 1 min, Denaturation 95 °C for 10 sec, Extension 60 °C for 30 sec-45 cycles, and melt curve at 60-95 °C. Average of three Ct values per sample was calculated and ΔCt values were determined using the equation “ΔCt=Ct (average of SNORD13 mutant)- Ct (average of U6). Then the 2-(ΔCt) values of each construct were normalized to the wild type value using the equation “Normalization=2-(ΔCt) of SNORD mutant/ 2-(ΔCt) of WT SNORD13. Values represent n =3 biological replicates, analyzed by two-tailed Welch’s *t* test (ns = not significant, * = *P* < 0.05, ** = *P* < 0.01, *** = *P* < 0.001, and **** = *P* < 0.0001).

**RT-qPCR primer sequences**

| **Gene** | **Forward primer** | **Reverse primer** |
| --- | --- | --- |
| 18S-A | TAGGAATTGTAGTTCATGAGCGTG | GGTCAGACGGGTAATGTGC |
| 18S-B | ATCCTTTTGTTCAAGTTGAGCG | GGTCAGACGGGTAATGTGC |
| 18S-AB full comp | ATCCTTCCGCAGGTTCAC | TTACGACGTGGGCACATT |
| WT/ 18S-C/ Stem I | ATCCTTTTGTAGTTCATGAGCGTG | GGTCAGACGGGTAATGTGC |
| Stem II | ATCCTTTTGTAGTTCATGAGCGTG | GGTCAGACGGGTAAACACGC |
| Stem III | ATCCTTTTGTAGTTCATGAGCGTG | GGTCAGACCCCAAATGTGCC |
| U6 | GCTTCGGCAGCACATATACTAAAA | CGCTTCACGAATTTGCGTGTCAT |

**Multiple sequence alignments of SNORD13 in representative organisms**

Multiple sequence alignments of SNORD13 in representative organismsof Metazoan and Viridiplantae kingdoms*1* were generated with Molecular Evolutionary Genetic Analysis (MEGAX)*2* and ClustalW.*3* If necessary, the alignment of sequences were curated manually  to correctly align well-established RNA motifs (e.g., box C, box D, 18S rRNA antisense elements). The human SNORD13 sequence and its 3'-flanking region (~15 nt-long) were manually curated for putative intramolecular base-pairing interactions. Within this framework, we inferred that the C- and D- boxes are brought together to form a kink-turn motif, as previously observed for box C/D snoRNAs. This allowed us to predict five stem structures denoted as Stem I, II, III, IV and V.  Stem I was already proposed by Tyc et al.*4* Note that, at that time, the authors were not aware of the existence of a k-turn in box C/D snoRNAs, nor of the ability of SNORD13 to base-pair with 18S rRNA. The relevance of these five putative RNA helical structures was then  established by a phylogenetic comparative approach that consisted in identifying covarying nucleotides that maintain base-pairing interactions in the stems, either Watson-Crick base-pair *c*ompensatory mutations or GU Wobble pairs. The schematic representation of the stems were manually drawn using Adobe Illustrator.

**Table S1**

| **SNORD13 WT and mutant sequences** | |
| --- | --- |
| U13-wt | GATCCTTTTGTAGTTCATGAGCGTGATGATTGGGTGTTCATACGCTTGTGTGAGATGTGCCACCCTTGAACCTTGTTACGACGTGGGCACATTACCCGTCTGACC |
| U13-Cmut | GATCCTTTTGTAGTTCATGAGCGACTACTTTGGGTGTTCATACGCTTGTGTGAGATGTGCCACCCTTGAACCTTGTTACGACGTGGGCACATTACCCGTCTGACC |
| U13-Dmut | GATCCTTTTGTAGTTCATGAGCGTGATGATTGGGTGTTCATACGCTTGTGTGAGATGTGCCACCCTTGAACCTTGTTACGACGTGGGCACATTACCCGTGACTCC |
| U13-stem-I | GATCCTTTTGTAGTTCATGAGCGTGATGATTGGGTGTTCATACGCTTGTCACTGATGTGCCACCCTTGAACCTTGTTACGACGTGGGCACATTACCCGTCTGACC |
| U13-stem-I-comp | GATCCTTTTGTAGTTCATGAGCGTGATGATTGGGTGTAGTGACGCTTGTCACTGATGTGCCACCCTTGAACCTTGTTACGACGTGGGCACATTACCCGTCTGACC |
| U13-stem-II | GATCCTTTTGTAGTTCATGAGCGTGATGATTGGGTGTTCATACGCTTGTGTGAGATGTGCCACCCTTGAACCTTGTTACGACGTGGCGTGTTTACCCGTCTGACC |
| U13-stem-II-comp | GATCCTTTTGTAGTTCATGAGCGTGATGATTGGGTGTTCATACGCTTGTGTGAGAACACGCACCCTTGAACCTTGTTACGACGTGGCGTGTTTACCCGTCTGACC |
| U13-stem-III | GATCCTTTTGTAGTTCATGAGCGTGATGATTCCCAGTTCATACGCTTGTGTGAGATGTGCCACCCTTGAACCTTGTTACGACGTGGGCACATTACCCGTCTGACC |
| U13-stem-III-comp | GATCCTTTTGTAGTTCATGAGCGTGATGATTCCCAGTTCATACGCTTGTGTGAGATGTGCCACCCTTGAACCTTGTTACGACGTGGGCACATTTGGGGTCTGACC |
| U13-stem-IV | GATCCTTTTGTAGTTCATGAGCGTGATGATTGGGTGTTCATACGCTTGTGTGAGATGTGCCACCCTTGAACCTTGTTACGACGTGGCACATTACCCGTCTGACCACTTGATCAAGGATC |
| U13-stem-IV-comp | GATCCTTTTGTTCAAGTTGAGCGTGATGATTGGGTGTTCATACGCTTGTGTGAGATGTGCCACCCTTGAACCTTGTTACGACGTGGGCACATTACCCGTCTGACCACTTGATCAAGGATC |
| U13-18S-A | CTAGGAATTGTAGTTCATGAGCGTGATGATTGGGTGTTCATACGCTTGTGTGAGATGTGCCACCCTTGAACCTTGTTACGACGTGGGCACATTACCCGTCTGACC |
| U13-18S-B | GATCCTTTTGTACAAGTAGAGCGTGATGATTGGGTGTTCATACGCTTGTGTGAGATGTGCCACCCTTGAACCTTGTTACGACGTGGGCACATTACCCGTCTGACC |
| U13-18S-C | ATCCTTTTGTAGTTCATGAGCGTGATGATTGGGTGTTCATACGCTTGTGTGAGATGTGCCACCCTTGATGGAACAATCGACGTGGGCACATTACCCGTCTGACC |
| hU13-18S_AB perfect comp | GATCCTTCCGCAGGTTCACGAGCGTGATGATTGGGTGTTCATACGCTTGTGTGAGATGTGCCACCCTTGAACCTTGTTACGACGTGGGCACATTACCCGTCTGACCGTGAACCTGCGGAAGGATC |
| **h45-ITS1 WT and mutant sequences** | |
| **h45-WT** | AGAGGAAGTAAAAGTCGTAACAAGG**TTTCCGTAGG**TGAA**CCTGCGGAAG**GATCATTAacggagcccggag |
| **h45_m1** | AGAGGAAGTAAAAGTCGTAACAAGG**TTACCGTAGG**TGAA**CCTGCGGAAG**GATCATTAacggagcccggag |
| **h45_m2** | AGAGGAAGTAAAAGTCGTAACAAGG**TTTGCGTAGG**TGAA**CCTGCGGAAG**GATCATTAacggagcccggag |
| **h45_m3** | AGAGGAAGTAAAAGTCGTAACAAGG**TTTCCCTAGG**TGAA**CCTGCGGAAG**GATCATTAacggagcccggag |
| **h45_m4** | AGAGGAAGTAAAAGTCGTAACAAGG**TTTCCGAAGG**TGAA**CCTGCGGAAG**GATCATTAacggagcccggag |
| **h45_m5** | AGAGGAAGTAAAAGTCGTAACAAGG**TTTCCGTTGG**TGAA**CCTGCGGAAG**GATCATTAacggagcccggag |
| **h45_m6** | AGAGGAAGTAAAAGTCGTAACAAGG**TTTCCGTACG**TGAA**CCTGCGGAAG**GATCATTAacggagcccggag |
| **h45_m7** | AGAGGAAGTAAAAGTCGTAACAAGG**TTAGCCATCG**TGAA**CCTGCGGAAG**GATCATTAacggagcccggag |
| **h45_m8** | AGAGGAAGTAAAAGTCGTAACAAGG**TTCCCGTAG**ATGAA**CCTACGGAAG**GATCATTAacggagcccggag |
| **h45-ACG** | AGAGGAAGTAAAAGTCGTAACAAGG**TTTACGTAGG**TGAA**CCTGCGGAAG**GATCATTAacggagcccggag |
| **h45-UCG** | AGAGGAAGTAAAAGTCGTAACAAGG**TTTUCGTAGG**TGAA**CCTGCGGAAG**GATCATTAacggagcccggag |
| **h45-CCA** | AGAGGAAGTAAAAGTCGTAACAAGG**TTTCCATAGG**TGAA**CCTGCGGAAG**GATCATTAacggagcccggag |
| **h45-CCU** | AGAGGAAGTAAAAGTCGTAACAAGG**TTTCCUTAGG**TGAA**CCTGCGGAAG**GATCATTAacggagcccggag |
| **h45_ins1** | AGAGGAAGTAAAAGTCGTAACAAGG**TTTCCCGTAGG**TGAA**CCTGCGGAAG**GATCATTAacggagcccggag |
| **h45_ins2** | AGAGGAAGTAAAAGTCGTAACAAGG**TTTCCCCGTAGG**TGAA**CCTGCGGAAG**GATCATTAacggagcccggag |
| **h45_ins3** | AGAGGAAGTAAAAGTCGTAACAAGG**TTTCCGTACGG**TGAA**CCTGCGGAAG**GATCATTAacggagcccggag |
| **h45_ins4** | AGAGGAAGTAAAAGTCGTAACAAGG**TTTCCGTA**C**CGG**TGAA**CCTGCGGAAG**GATCATTAacggagcccggag |
| **h45_ins5** | AGAGGAAGTAAAAGTCGTAACAAGG**TTT**C**CCGTACGG**TGAA**CCTGCGGAAG**GATCATTAacggagcccggag |
| **h45_ins6** | AGAGGAAGTAAAAGTCGTAACAAGG**TTT**C**CCGTACCGG**TGAA**CCTGCGGAAG**GATCATTAacggagcccggag |
| **shifted 5’-CCG-3’ +1** | AGAGGAAGTAAAAGTCGTAACAAGG**TTTCCCGAGG**TGAA**CCTGCGGAAG**GATCATTAacggagcccggag |
| **shifted 5’-CCG-3’ +3** | AGAGGAAGTAAAAGTCGTAACAAGG**TTTCCGCCGG**TGAA**CCTGCGGAAG**GATCATTAacggagcccggag |
| **h45_18SA** | AGAGGAAGTAAAAGTCGTAACAAGG**TTTC*C*GTAGG**TGAA**CCTGCGGTTC**CTACATTAacggagcccggag |

**References**

[1] Bortolin-Cavaille, M. L., Quillien, A., Thalalla Gamage, S., Thomas, J. M., Sas-Chen, A., Sharma, S., Plisson-Chastang, C., Vandel, L., Blader, P., Lafontaine, D. L. J., Schwartz, S., Meier, J. L., and Cavaille, J. (2022) Probing small ribosomal subunit RNA helix 45 acetylation across eukaryotic evolution, *Nucleic Acids Res* *50*, 6284-6299.

[2] Kumar, S., Stecher, G., Li, M., Knyaz, C., and Tamura, K. (2018) MEGA X: Molecular Evolutionary Genetics Analysis across Computing Platforms, *Mol Biol Evol* *35*, 1547-1549.

[3] Eddy, S. R. (1995) Multiple alignment using hidden Markov models, *Proc Int Conf Intell Syst Mol Biol* *3*, 114-120.

[4] Tyc, K., and Steitz, J. A. (1989) U3, U8 and U13 comprise a new class of mammalian snRNPs localized in the cell nucleolus, *EMBO J* *8*, 3113-3119.
